# Supplementary material for: Research priorities for progressive pulmonary fibrosis in the UK
Source: PubMed Central journal article supplement (PMC11428979; doi:10.1136/bmjresp-2024-002368), 2024-09-03
Supplement: bmjresp-11-1-s002.pdf [file bmjresp-11-1-s002.pdf]

| No | Item                                         | Descriptor and/or examples                                                                                                                                                                            | Page |
|----|----------------------------------------------|-------------------------------------------------------------------------------------------------------------------------------------------------------------------------------------------------------|------|
| A  | Context and scope                            |                                                                                                                                                                                                       |      |
| 1  | Define geographical scope                    | Global, regional, national, city, local area, institutional/organizational level, health service                                                                                                      | 4    |
| 2  | Define health area, field, focus             | Disease or condition specific, interventions, healthcare delivery, health system                                                                                                                      | 3    |
| 3  | Define the intended beneficiaries            | This may include the general population or a specific population based on demographic (age, gender), clinical (disease, condition), or other characteristics who may benefit from the research        | 3    |
| 4  | Define the target audience of the priorities | Policy makers, funders, researchers, industry or others who have the potential to implement the priorities identified                                                                                 | 3    |
| 5  | Identify the research area                   | Public health, health services research, clinical research, basic science                                                                                                                             | 4    |
| 6  | Identify the type of research questions      | Etiology, diagnosis, prevention, treatment (interventions), prognosis, health services, psychosocial, behavioral and social science, economic evaluation, implementation; this may not be pre-defined | 4    |
| 7  | Define the time frame                        | Interim, short-term, long-term priorities, plans to revise and update                                                                                                                                 | NA   |
| B  | Governance and team                          |                                                                                                                                                                                                       |      |

|    |                                                                             |                                                                                                                                                                                                                    |     |
|----|-----------------------------------------------------------------------------|--------------------------------------------------------------------------------------------------------------------------------------------------------------------------------------------------------------------|-----|
| 8  | Describe the selection and structure of the leadership and management team  | Those responsible for initiating, developing, and guiding the process for priority setting, and examples of structures include; Steering Committee, Advisory Group, Technical Experts                              | 4   |
| 9  | Describe the characteristics of the team                                    | Stakeholder group or role, institutional affiliations, country or region, demographics (e.g. age sex), discipline, experience, expertise                                                                           | 4   |
| 10 | Describe any training or experience relevant to conducting priority setting | Consultants or advisors, members with experience or skills relevant to the conducting priority-setting e.g. qualitative methods, surveys, facilitation                                                             | NA  |
| C  | Framework for priority setting                                              |                                                                                                                                                                                                                    |     |
| 11 | State the framework used (if any)                                           | James Lind Alliance, COHRED, CHNRI, Dialogue Model, no framework (general research priority setting)                                                                                                               | 3-4 |
| D  | Stakeholders or participants                                                |                                                                                                                                                                                                                    |     |
| 12 | Define the inclusion criteria for stakeholders involved in priority-setting | Patients, caregivers, general community, health professionals, researchers, policy makers, non-governmental organizations, government, industry; specific groups including vulnerable and marginalized populations | 4   |
| 13 | State the strategy or method for identifying and engaging stakeholders      | Partnership with organizations, social media, recruitment through hospitals                                                                                                                                        | 4-5 |

|    |                                                                                           |                                                                                                                                                                                                                                                                                                            |     |
|----|-------------------------------------------------------------------------------------------|------------------------------------------------------------------------------------------------------------------------------------------------------------------------------------------------------------------------------------------------------------------------------------------------------------|-----|
| 14 | Indicate the number of participants and/or organizations involved                         | Number of individuals and organizations, include number by stakeholder group                                                                                                                                                                                                                               | 6-8 |
| 15 | Describe the characteristics of stakeholders                                              | Stakeholder group, demographic characteristics, areas of interest and expertise, discipline, affiliations                                                                                                                                                                                                  | 6-8 |
| 16 | State if reimbursement for participation was provided                                     | Cash, vouchers, certificates, acknowledgement; what purpose e.g. travel, accommodation, honorarium                                                                                                                                                                                                         | NA  |
| E  | Identification and collection of research priorities                                      |                                                                                                                                                                                                                                                                                                            |     |
| 17 | Describe methods for collecting initial priorities                                        | Methods e.g. Delphi survey, surveys, nominal group technique, interviews, focus groups, meetings, workshops; prioritization e.g. voting, ranking; mode e.g. face-to-face, online; may be informed by evidence e.g. systematic reviews, reviews of guidelines/other documents, health technology assessment | 4-5 |
| 18 | Describe methods for collating and categorizing priorities                                | Taxonomy or other framework used to organize, summarise, and aggregate topics or questions                                                                                                                                                                                                                 | 4-5 |
| 19 | Describe methods and reasons for modifying (removing, adding, reframing) priorities       | Based on scope, clarity, definition, duplication, other criteria                                                                                                                                                                                                                                           | 4-5 |
| 20 | Describe methods for refining or translating priorities into research topics or questions | Reviewed by Steering Committee or project team                                                                                                                                                                                                                                                             | 4-5 |

|    |                                                                                                                                         |                                                                                                              |     |
|----|-----------------------------------------------------------------------------------------------------------------------------------------|--------------------------------------------------------------------------------------------------------------|-----|
| 21 | Describe methods for checking whether research questions or topics have been answered                                                   | Systematic reviews, evidence mapping, consultation with experts                                              | 4-5 |
| 22 | Describe number of research questions or topics                                                                                         | Number of priorities at each stage of the process                                                            | 6-8 |
| F  | Prioritization of research topics/questions                                                                                             |                                                                                                              |     |
| 23 | Describe methods and criteria for prioritizing research topics or questions                                                             | Methods e.g. Delphi survey, surveys, nominal group technique, interviews, focus groups, meetings, workshops; | 7   |
| 24 | State the method or threshold for excluding research topics/questions                                                                   | Thresholds for ranking scores, proportions, votes; other criteria                                            | 4-5 |
| G  | Output                                                                                                                                  |                                                                                                              |     |
| 25 | State the approach to formulating the research priorities                                                                               | Area, topic, questions, PICO (population, intervention, comparator, outcome)                                 | 4-5 |
| H  | Evaluation and feedback                                                                                                                 |                                                                                                              |     |
| 26 | Describe how the process of prioritization was evaluated                                                                                | Survey, workshop                                                                                             | NA  |
| 27 | Describe how priorities were fed back to stakeholders and/or to the public; and how feedback (if received) was addressed and integrated | Public meetings or workshop, newsletters, website, email, online presentations                               | NA  |
| I  | Implementation                                                                                                                          |                                                                                                              |     |

|    |                                                                  |                                                                                                                                                                                               |      |
|----|------------------------------------------------------------------|-----------------------------------------------------------------------------------------------------------------------------------------------------------------------------------------------|------|
| 28 | Outline the strategy or action plans for implementing priorities | Communication with target audience, via policies and funding                                                                                                                                  | 8-11 |
| 29 | Describe plans, strategies, or suggestions to evaluate impact    | Integration in decision-making, funding allocation, review of relevant documents                                                                                                              | NA   |
| J  | Funding and conflict of interest                                 |                                                                                                                                                                                               |      |
| 30 | State sources of funding                                         | Name sources of funding for the priority-setting exercise; if relevant include the budget and/or cost                                                                                         | 6    |
| 31 | Declare any conflicts or competing interests                     | State any conflicts of interest that may be at an individual level and/or at a contextual level (e.g. political issues, controversies) that may affect the process, output or implementation. | 20   |
